# Supplementary material for: Rugitermesursulae (Isoptera, Kalotermitidae), a new drywood termite from the Caribbean coast of Colombia
Source: Zookeys. 2021 Aug 25;1057:23–36. doi: 10.3897/zookeys.1057.65877 (PMC8410751; doi:10.3897/zookeys.1057.65877)
Supplement: Supplementary material 1 — Tables S1, S2 [file zookeys-1057-023-s001.xlsx]

## Sheet: Table S1. NCBI Sequences
Table S1. GenBank accession numbers for COII gene sequences of Kalotermitidae used in this study.
No.	NCBI Access	Species/Morphotype	Localities	References*
1	AF189080.1	Bifiditermes improbus	Braidwood, Australia	Thompson et al. 2010
2	EU253877.1	Calcaritermes temnocephalus	NA	Lagendre et al. 2008
3	AF189089.1	Ceratokalotermes spoliator	Mullion, Australia	Thompson et al. 2010
4	EU253878.1	Comatermes perfectus	NA	Lagendre et al. 2009
5	MK922258.1	Cryptotermes cavifrons	NA	Unpublished
6	FN377806.1	Cryptotermes longicollis	Mexico	Desai et al. 2010
7	DQ442125.1	Epicalotermes mkuzii	South Africa	Inward et al. 2007
8	AF189096.1	Glyptotermes brevicornis	Gasgarra, Australia	Thompson et al. 2010
9	AF189098.1	Glyptotermes eukalypti	Braidwood, Australia	Thompson et al. 2010
10	AF189099.1	Glyptotermes tuberculatus	Blakehurst, Australia	Thompson et al. 2010
11	AB109542.1	Incisitermes immigrans	NA	Ohkuma et al. 2004
12	MH234598.1	Incisitermes schwarzi	San Antero, Colombia	Janowiecki et al. 2020
13	MK922265.1	Incisitermes sp. Ix384	NA	Unpublished
14	AF189104.1	Kalotermes aemulus	Western Australia	Thompson et al. 2010
15	AF189104.1	Kalotermes brouni	Muriwai Beach, New Zealand	Thompson et al. 2010
16	AF189101.1	Kalotermes hilli	Western Australia	Thompson et al. 2010
17	KC914290.1	Longicaputermes sinaicus	Hatzeva, Israel	Ghesini et al. 2014
18	KJ907844.1	Marginitermes sp. 9MH1	Arizona, USA	Abdul 2015
19	EU253882.1	Neotermes holmgreni	NA	Lagendre et al. 2010
20	AF189105.1	Neotermes insularis	Kinglake, Australia	Thompson et al. 2010
21	MK922256.1	Neotermes sp. Ni219	NA	Unpublished
22	EU253884.1	Procryptotermes leewardensis	NA	Lagendre et al. 2012
23	KX267096.1	Proneotermes sp. RCD-2016	Colosó, Colombia	Casalla et al. 2016b
24	DQ442092.1	Postelectrotermes amplus	Madagascar	Inward et al 2007
25	EU253883.1	Postelectrotermes howa	NA	Lagendre et al. 2011
26	FJ818999.1	Postelectrotermes sp. 1 MTM-2009	Madagascar	Monoghan et al. 2009
27	MW600961	Rugitermes ursulae sp.nov	Colosó, Colombia	This publication
28	MW600962	Rugitermes ADD 2015-29	Fundación, Colombia	This publication
29	KP026284.1	Rugitermes A TB-2004	Petit Saut, French Guiana	Bourguignon et al. 2015
30	MH766486.1	Roisinitermes ebogoensis	Ebogo II village, Cameroon	Scheffrahn et al. 2018
31	AB005462.1	Cryptocercus punctulatus	NA	Maekawa et al. 1999
NA = Not available
* Supplementary information

## Sheet: Table S2. Genetic distances
Table S2. Nucleotide p-distances for COII sequences between Rugitermes ursula sp. nov and other species belonging to Kalotermitidae. Cryptocercus punctulatus used as outgroup.
NCBI / Species/Morphotypes			Cryptocercus punctulatus	Longicaputermes sinaicus	Calcaritermes temnocephalus	Kalotermes hilli	Kalotermes brouni	Kalotermes aemulus	Glyptotermes eukalypti	Glyptotermes brevicornis	Glyptotermes tuberculatus	Ceratokalotermes spoliator	Comatermes perfectus	Bifiditermes improbus	Proneotermes macondianus	Neotermes insularis	Neotermes sp. Ni219	Neotermes koshunensis	Epicalotermes mkuzii	Postelectrotermes amplus	Postelectrotermes howa	Postelectrotermes sp. 1 MTM-2009	Rugitermes ursulae sp. nov	Rugitermes sp. ADD 2015-29	Rugitermes sp. A TB 2004	Marginitermes sp. 9MH1	Roisinitermes ebogoensis	Procryptotermes leewardensis	Cryptotermes longicollis	Cryptotermes cavifrons	Incisitermes immigrans	Incisitermes schwarzi	Incisitermes sp. Ix384
			AB005462.1	KC914290.1	EU253877.1	AF189101.1	AF189104.1	AF189100.1	AF189098.1	AF189096.1	AF189099.1	AF189089.1	EU253878.1	AF189080.1	KX267096.1	AF189105.1	MK922256.1	AB011408.1	DQ442125.1	DQ442092.1	EU253883.1	FJ818999.1	MW600961	MW600962	KP026284.1	KJ907844.1	MH766486.1	EU253884.1	FN377806.1	MK922258.1	AB109542.1	MH234598.1	MK922265.1
AB005462.1		Cryptocercus punctulatus
KC914290.1		Longicaputermes sinaicus	0.280551
EU253877.1		Calcaritermes temnocephalus	0.227194	0.244406
AF189101.1		Kalotermes hilli	0.256454	0.223752	0.196213
AF189104.1		Kalotermes brouni	0.2358	0.216867	0.19105	0.165232
AF189100.1		Kalotermes aemulus	0.24957	0.223752	0.189329	0.0774527	0.123924
AF189098.1		Glyptotermes eukalypti	0.239243	0.237522	0.192771	0.197935	0.199656	0.203098
AF189096.1		Glyptotermes brevicornis	0.242685	0.22031	0.165232	0.197935	0.203098	0.208262	0.111876
AF189099.1		Glyptotermes tuberculatus	0.225473	0.211704	0.163511	0.166954	0.180723	0.177281	0.115318	0.0946644
AF189089.1		Ceratokalotermes spoliator	0.237522	0.215146	0.203098	0.146299	0.148021	0.151463	0.194492	0.20654	0.187608
EU253878.1		Comatermes perfectus	0.227194	0.246127	0.199656	0.177281	0.204819	0.20654	0.179002	0.187608	0.168675	0.189329
AF189080.1		Bifiditermes improbus	0.230637	0.227194	0.197935	0.173838	0.213425	0.19105	0.184165	0.182444	0.156627	0.187608	0.173838
KX267096.1		Proneotermes macondianus	0.258176	0.20654	0.211704	0.177281	0.204819	0.182444	0.189329	0.182444	0.160069	0.192771	0.194492	0.156627
AF189105.1		Neotermes insularis	0.24957	0.246127	0.208262	0.185886	0.199656	0.196213	0.19105	0.180723	0.185886	0.187608	0.179002	0.172117	0.177281
MK922256.1		Neotermes sp. Ni219	0.24957	0.242685	0.225473	0.203098	0.225473	0.215146	0.179002	0.19105	0.179002	0.211704	0.185886	0.170396	0.172117	0.101549
AB011408.1		Neotermes koshunensis	0.247849	0.242685	0.215146	0.175559	0.216867	0.189329	0.19105	0.196213	0.165232	0.192771	0.182444	0.163511	0.16179	0.118761	0.120482
DQ442125.1		Epicalotermes mkuzii	0.232358	0.216867	0.196213	0.192771	0.203098	0.196213	0.203098	0.192771	0.182444	0.194492	0.184165	0.154905	0.185886	0.197935	0.189329	0.199656
DQ442092.1		Postelectrotermes amplus	0.240964	0.228916	0.20654	0.173838	0.204819	0.184165	0.192771	0.175559	0.170396	0.201377	0.184165	0.154905	0.179002	0.170396	0.177281	0.180723	0.173838
EU253883.1		Postelectrotermes howa	0.221071	0.224525	0.214162	0.183074	0.196891	0.17962	0.198618	0.181347	0.181347	0.198618	0.177893	0.160622	0.177893	0.146805	0.170984	0.169257	0.164076	0.0915371
FJ818999.1		Postelectrotermes sp. 1 MTM-2009	0.237522	0.225473	0.204819	0.182444	0.192771	0.179002	0.177281	0.172117	0.175559	0.179002	0.166954	0.153184	0.160069	0.166954	0.172117	0.179002	0.172117	0.108434	0.110535
MW600961		Rugitermes ursulae sp. nov	0.273666	0.258176	0.215146	0.175559	0.199656	0.182444	0.209983	0.204819	0.192771	0.211704	0.204819	0.192771	0.194492	0.196213	0.20654	0.199656	0.170396	0.177281	0.177893	0.179002
MW600962		Rugitermes sp. ADD 2015-29	0.280763	0.261698	0.232236	0.192374	0.214905	0.195841	0.209705	0.213172	0.188908	0.218371	0.220104	0.187175	0.195841	0.209705	0.204506	0.207972	0.187175	0.188908	0.193043	0.175043	0.135182
KP026284.1		Rugitermes sp. A TB 2004	0.244406	0.282272	0.22031	0.209983	0.227194	0.208262	0.218589	0.213425	0.211704	0.211704	0.209983	0.194492	0.211704	0.213425	0.218589	0.211704	0.199656	0.196213	0.188256	0.170396	0.127367	0.159445
KJ907844.1		Marginitermes sp. 9MH1	0.234483	0.237931	0.215517	0.224138	0.210345	0.215517	0.22069	0.22931	0.208621	0.222414	0.212069	0.194828	0.212069	0.210345	0.205172	0.208621	0.175862	0.194828	0.185121	0.187931	0.222414	0.237847	0.227586
MH766486.1		Roisinitermes ebogoensis	0.233969	0.258232	0.221837	0.197574	0.221837	0.211438	0.218371	0.216638	0.207972	0.187175	0.216638	0.168111	0.181976	0.188908	0.209705	0.206239	0.166378	0.190641	0.184348	0.190641	0.190641	0.21466	0.207972	0.21875
EU253884.1		Procryptotermes leewardensis	0.266781	0.246127	0.222031	0.194492	0.22031	0.196213	0.213425	0.216867	0.194492	0.203098	0.204819	0.192771	0.201377	0.189329	0.192771	0.184165	0.196213	0.189329	0.176166	0.173838	0.20654	0.207972	0.209983	0.224138	0.206239
FN377806.1		Cryptotermes longicollis	0.258176	0.234079	0.223752	0.185886	0.22031	0.196213	0.232358	0.234079	0.209983	0.20654	0.222031	0.182444	0.189329	0.215146	0.203098	0.211704	0.182444	0.228916	0.212435	0.222031	0.227194	0.230503	0.242685	0.218966	0.214905	0.165232
MK922258.1		Cryptotermes cavifrons	0.24957	0.234079	0.208262	0.168675	0.213425	0.187608	0.223752	0.223752	0.201377	0.201377	0.211704	0.173838	0.185886	0.203098	0.197935	0.199656	0.182444	0.216867	0.210708	0.204819	0.222031	0.221837	0.227194	0.213793	0.211438	0.153184	0.0258176
AB109542.1		Incisitermes immigrans	0.259897	0.223752	0.216867	0.189329	0.22031	0.201377	0.216867	0.209983	0.194492	0.215146	0.209983	0.182444	0.179002	0.199656	0.196213	0.199656	0.189329	0.196213	0.200345	0.163511	0.201377	0.20104	0.22031	0.227586	0.194107	0.19105	0.194492	0.177281
MH234598.1		Incisitermes schwarzi	0.271945	0.227194	0.225473	0.199656	0.239243	0.223752	0.228916	0.218589	0.20654	0.228916	0.216867	0.185886	0.180723	0.20654	0.203098	0.211704	0.196213	0.199656	0.210708	0.182444	0.222031	0.209705	0.234079	0.224138	0.190641	0.20654	0.199656	0.185886	0.0550775
MK922265.1		Incisitermes sp. Ix384	0.242685	0.228916	0.203098	0.180723	0.222031	0.19105	0.170396	0.168675	0.163511	0.20654	0.196213	0.160069	0.168675	0.184165	0.180723	0.180723	0.182444	0.175559	0.169257	0.166954	0.19105	0.195841	0.194492	0.206897	0.188908	0.166954	0.185886	0.182444	0.151463	0.153184
			Genetic p-distance			0.02	0.04	0.06	0.08	0.1	0.12	0.14	0.16	0.18	0.2	0.22	0.24	0.26	0.28	0.3
